# Supplementary material for: Rainfall Determines Shallow Soil Seepage in a Piedmont Summer Pasture of Alpine Meadow on the Northeastern Qinghai–Tibetan Plateau
Source: MDPI journal article supplement (doi:10.3390/w13202815), 2021-10-10
Supplement: s1 [file s1]

**Table S1.** The forward method (Likelihood Ratio) binary Logistic regressions of daily soil seepage events in the summer pasture of alpine meadow (Rain-fre: rainfall frequency; SWC: soil water content; Rain: rainfall amount).

| Model* | Variable | Coefficients | Sig. | Nagelkerke R <sup>2</sup> | Percentage correct |         |
|--------|----------|--------------|------|---------------------------|--------------------|---------|
|        |          |              |      |                           | No Seepage         | Seepage |
| I      | Rain-fre | 0.22         | 0.00 | 0.37                      | 94.2%              | 37.2%   |
| II     | Rain-fre | 0.22         | 0.00 | 0.50                      | 94.2%              | 46.5%   |
|        | SWC      | 24.24        | 0.00 |                           |                    |         |
| III*   | Rain     | 0.25         | 0.00 | 0.30                      | 94.8%              | 39.5%   |

Note: the model could be described as  $\text{Log}(P/(1-P)) = ax + b$ , where P is the probability of soil seepage, a is regression coefficient, b is the regression intercept,  $\text{log}(P/(1-P))$  is the logarithm of the odds ( $P/(1-P)$ ).

\*: The variable of Rain (rainfall amount) was forced and Rain-fre (rainfall frequency) was excluded into the model.

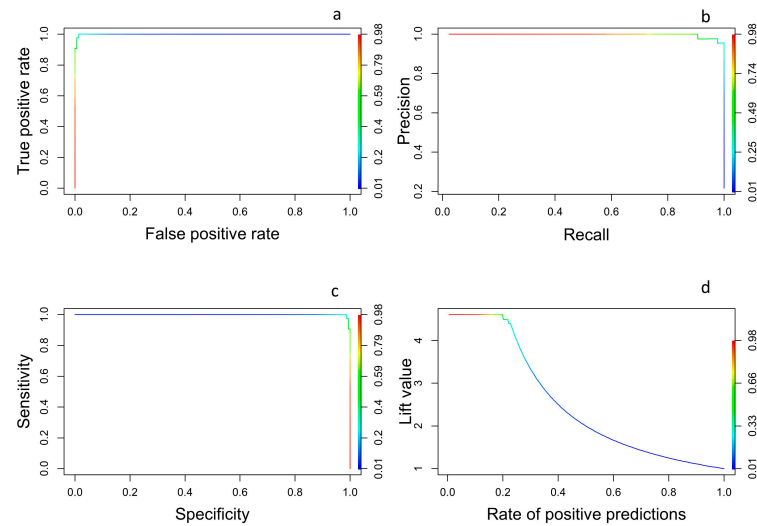

**Figure S1** The receiver operating characteristic curve (a), Precision/recall (b), Sensitivity/specificity (c) and Lift charts (d) from the boosted regression trees results. The plot was created by the “ROCR” package (Sing T, Sander O, Beerenwinkel N, Lengauer T. ROCR: visualizing classifier performance in R. *Bioinformatics* 2005, 21(20): 3940-3941) in R 4.0.2.

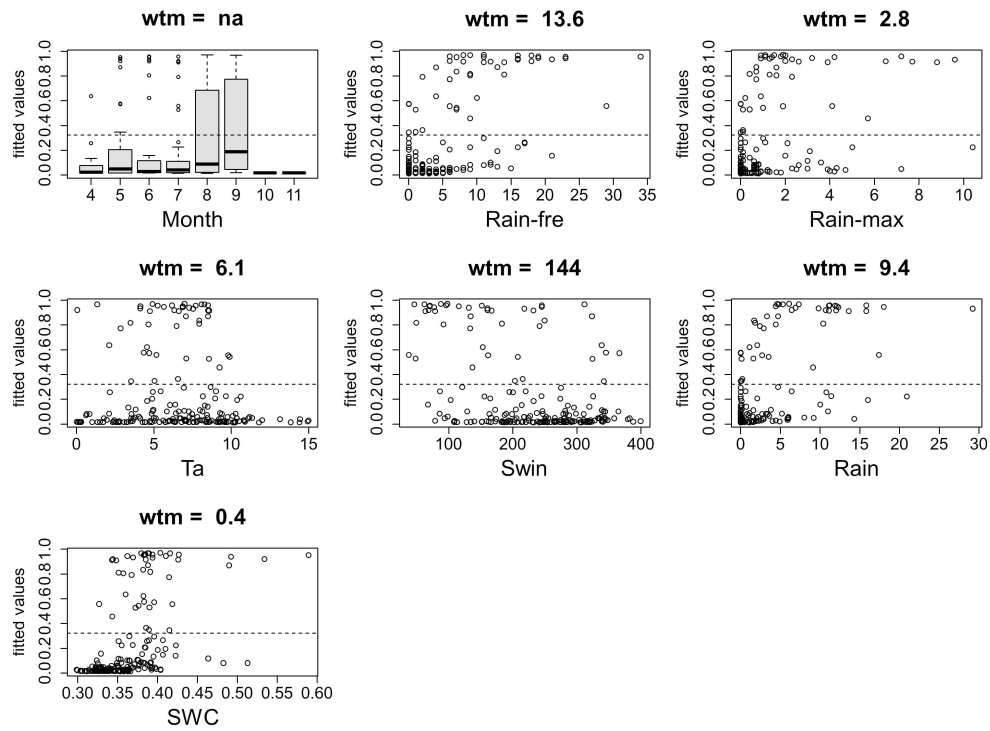

**Figure S2.** The fitted daily soil seepage probability in relation to each of the predictors used in the model (Month is categorical variable for the month period of soil seepage events, Rain-fre is daily rainfall frequency, Rain-max is the maximum half-hour rainfall amount, Ta is air temperature, Swin is solar radiation, Rain is rainfall amount, and SWC is soil water content).

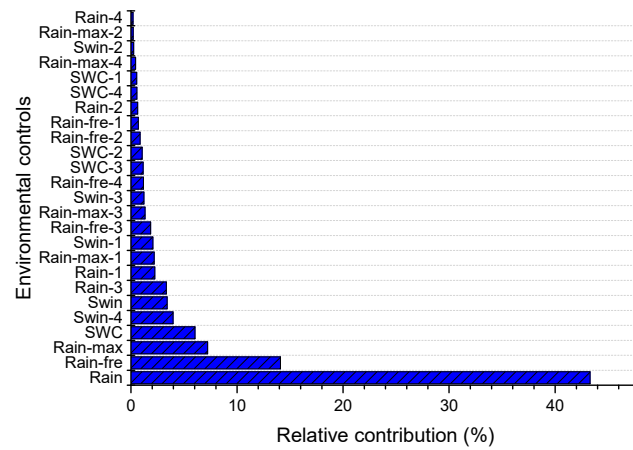

**Figure S3.** The relative contribution on daily soil seepage from boosted regression trees model (mean total deviance = 7.11, mean residual deviance = 0.35. Abbreviations: Rain: rainfall amount; Rain-fre: rainfall frequency; SWC: soil water content; Swin: solar radiation; the suffix number -4, -3, -2, -1 is the 4-day, 3-day, 2-day, and 1-day before seepage events (i.e., Swin-4 is solar radiation of four days before soil seepage event)).

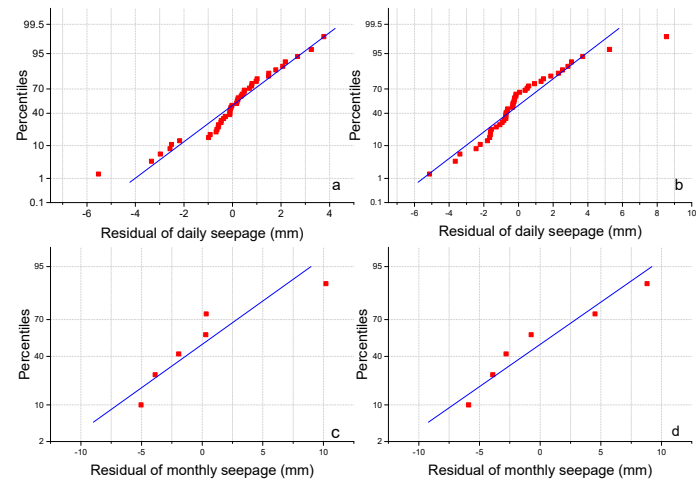

**Figure S4.** The percentiles of residual from linear (a, b and d) and logarithmic regression analysis on daily seepage (a and b) and monthly (c and d) seepage amount.

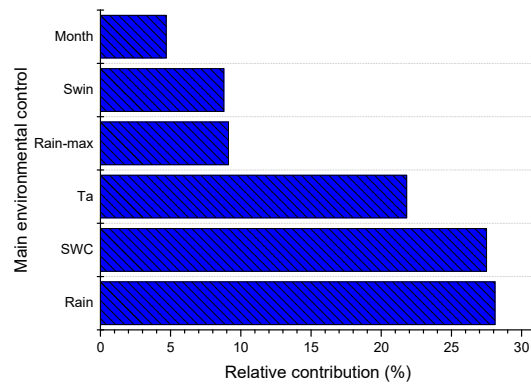

**Figure S5.** The relative contribution of main environmental controls (rainfall frequency was excluded) on daily soil seepage probability from boosted regression trees model (mean total deviance = 1.05, mean residual deviance = 0.51. abbreviations: Month is categorical variable for the month period of soil seepage events, Swin is solar radiation, Rain is the rainfall amount, Rain.max is the maximum half-hour rainfall amount, Ta is the air temperature, SWC is the soil water content).
